# Supplementary material
Source: publisher figshare collection journal article supplement (https://acs.figshare.com/ndownloader/files/4178329)

# Supporting Information

## **Application of electrochemically reduced graphene oxide on screen-printed ion-selective electrode**

Jianfeng Ping, Yixian Wang, Yibin Ying, Jian Wu\*

College of Biosystems Engineering and Food Science, Zhejiang University, Hangzhou

310058, PR China

\* Corresponding author: Prof. J. Wu

Tel./Fax: +86-571-88982180

*E-mail address:* wujian69@zju.edu.cn

**Figure S1.** Tapping-mode AFM image of ERGNO sheets with a height profile (blue curve; scale bar, 1.0 nm) taken along the red line. The sample was prepared by stirring the ERGNO attached electrode in water softly to disperse loosely attached ERGNO. A piece of mica immersed into the dispersion was employed for AFM characterization.

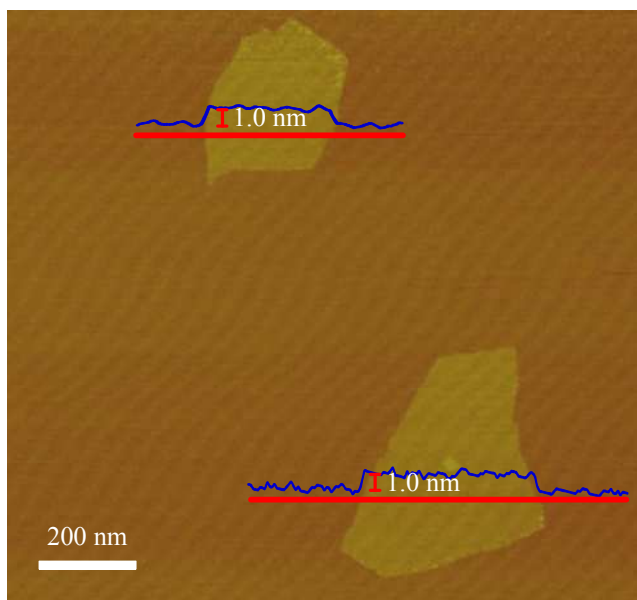

**Figure S2.** SEM image of the SPE/ERGNO surface.

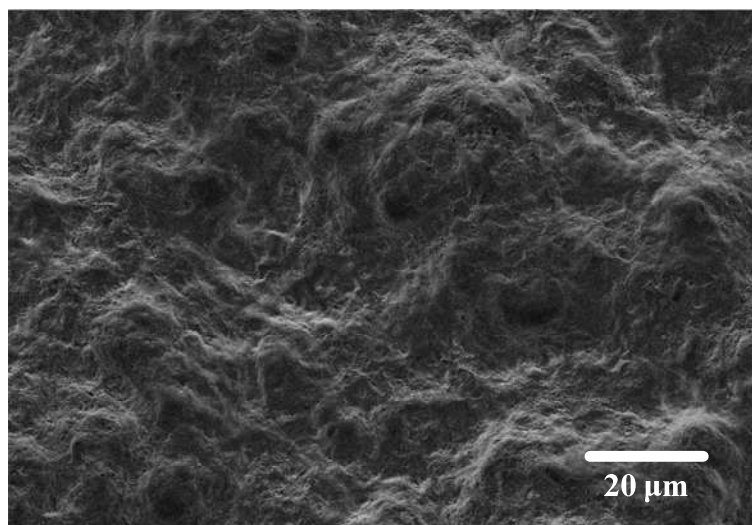

Supplement: Supplementary file 1 [file 4178329]
